# Supplementary figures and images for: Taxonomy Complexity of Some Tyrrhenian Endemic Limonium Species Belonging to L. multiforme Group (Plumbaginaceae): New Insights from Molecular and Morphometric Analyses
Source: MDPI journal article supplement (doi:10.3390/plants11223163), 2022-11-18

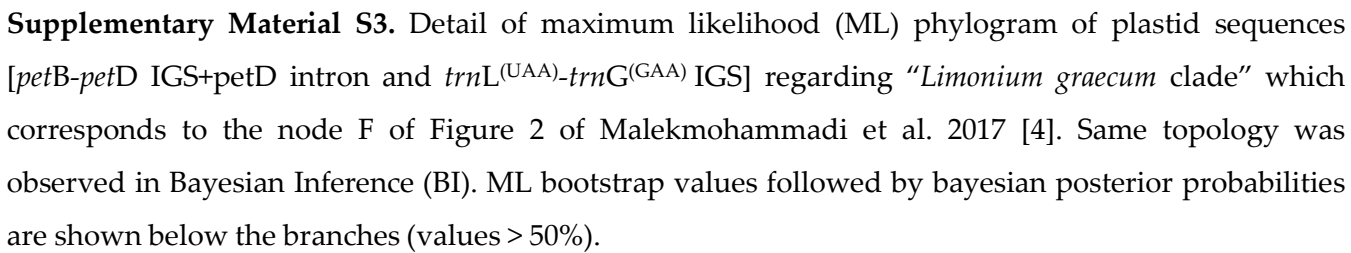

Supplement: s1 [file s1]
